# Supplementary material for: A SFTPC BRICHOS mutant links epithelial ER stress and spontaneous lung fibrosis
Source: JCI journal article supplement (doi:10.1172/jci.insight.126125), 2019-02-05
Supplement: sd1 [file 1]

## **SUPPLEMENTAL METHODS and DATA**

### **A *SFTPC* BRICHOS Mutant Links Epithelial ER Stress and Spontaneous Lung Fibrosis**

Jeremy Katzen<sup>1</sup>, Brandie D Wagner<sup>2</sup>, Alessandro Venosa<sup>1</sup>, Meghan Kopp<sup>1</sup>, Yaniv Tomer<sup>1</sup>,  
Scott J Russo<sup>1</sup>, Alvis C Headen<sup>1</sup>, Maria C Basil<sup>1</sup>, James M Stark<sup>3</sup>, Surafel Mulugeta<sup>1</sup>,  
Robin R Deterding<sup>4</sup>, and Michael F Beers<sup>1,5\*</sup>

<sup>1</sup>*Pulmonary, Allergy, and Critical Care Division, Department of Medicine, Perelman School of Medicine, University of Pennsylvania, Philadelphia, Pennsylvania*

<sup>2</sup>*Department of Biostatistics and Informatics, Colorado School of Public Health, Aurora, Colorado*

<sup>3</sup>*Division of Pediatric Pulmonology, Department of Pediatrics, University of Texas Health Science Center, Houston, Texas*

<sup>4</sup>*Department of Pediatrics and Breathing Institute, University of Colorado School of Medicine, Aurora, Colorado*

<sup>5</sup>*PENN Center For Pulmonary Biology, University of Pennsylvania, Perelman School of Medicine, Philadelphia, Pennsylvania*

## SUPPLEMENTARY METHODS

### *SFTPC Expression Plasmids*

For in vitro proSP-C trafficking studies, HEK293 cells (ATCC; CRL-3249) were grown to 85-90% confluency and transiently transfected with a family of *SFTPC* expression vectors encoding for either EGFP-fused wild-type (EGFP/SP-C<sup>WT</sup>) or mutant (EGFP/SP-C<sup>C121Y</sup> and EGFP/SP-C<sup>C121G</sup>) isoforms using Lipofectamine 2000 (Thermo Fisher Scientific) as previously described (1-3). For co-transfection studies, DsRed/ABCA3 expression vector was incorporate into the transfection protocol as previously described (4).

### *Efficiency of Neomycin Cassette Excision*

The efficiency of removal of the PGK-neo from *Sftpc* alleles of *Sftpc*<sup>C121G/C121G</sup> / *R26*<sup>Cre</sup> mice was measured by q-PCR on DNA isolated from AT2 cells obtained 7 days after tamoxifen administration. Primers were obtained (Applied Biosystems) based on previously described protocol to amplify a 62 base-pair DNA sequence within the Neo-Cassette:

Neo Fwd: 5'-CGACAAGACCGGCTTCCAT-3'

Neo Rev: 5'-CGACCACCAAGCGAAACAT-3'

Relative quantification of intact *sftpc*<sup>C121Gneo</sup> alleles was performed using the protocol previously described (5) with SYBR Green Master Mix (Applied Biosystems). *Rpp30* served as a housekeeping control:

*Rpp30* Fwd: 5'-TCCAGTGTGCAAGAAAGCTAAATG-3'

*Rpp30* Rev: 5'-GGCAGTGCGTGGAGACTCA-3'

Standard curves and melting point curves were constructed to validate assay specificity and efficiency.

Copy number of the PGK-neo cassette relative to *Rpp30* was calculated using the delta-Ct method.

***Measurement of Pulmonary Function and Pulse Oxymetry***

Invasive measurement of static lung compliance was performed with mice anesthetized with intraperitoneal pentobarbital. The mouse tracheas were cannulated with a 20-gauge metal stub adapter and then placed on a small-animal ventilator (flexiVent; SCIREQ, Inc. Toronto Canada) at 150 breaths per min and a tidal volume of 10 mL/kg of body weight. Static lung compliance was determined with the manufacturer's software using a 2 second breath pause maneuver. Arterial hemoglobin oxygen saturations were measured in anesthetized, spontaneously ventilating mice using a rodent pulse oximeter (PhysioSuite with MouseSTAT Pulse Oximeter Kent Scientific, Torrington, CT) per the manufacturer's instructions.

## **REFERENCES FOR SUPPLEMENTAL METHODS**

1. Wang WJ, Mulugeta S, Russo SJ, Beers MF. Deletion of exon 4 from human surfactant protein C results in aggresome formation and generation of a dominant negative. *J Cell Sci.* 2003;116(4):683-692.
2. Maguire JA, Mulugeta S, Beers MF. Multiple ways to die: Delineation of the unfolded protein response and apoptosis induced by Surfactant Protein C BRICHOS mutants. *Int J Biochem Cell Biol.* 2012;44(1):101-112.
3. Maguire JA, Mulugeta S, Beers MF. Endoplasmic Reticulum Stress Induced by Surfactant Protein C BRICHOS Mutants Promotes Proinflammatory Signaling by Epithelial Cells. *Am J Respir Cell Mol Biol.* 2011;44(3):404-414.
4. Beers MF, et al. A novel conserved targeting motif found in ABCA transporters mediates trafficking to early post-Golgi compartments. *J Lipid Res.* 2011;52(8):1471-1482.
5. Mancini C, Messana E, Turco E, Brussino A, Brusco A. Gene-targeted embryonic stem cells: real-time PCR assay for estimation of the number of neomycin selection cassettes. *Biological Procedures Online.* 2011;13(1):10.

## SUPPLEMENTAL FIGURES

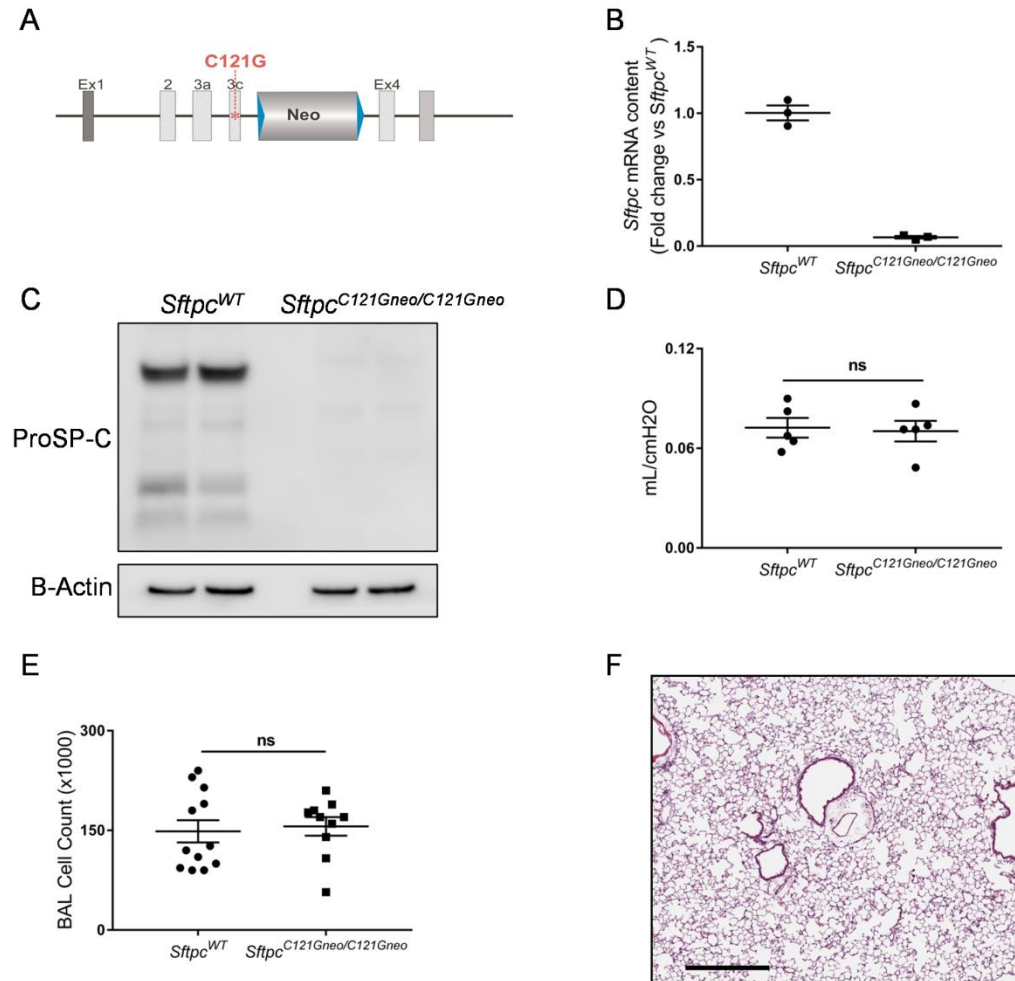

**Supplemental Figure 1. The hypomorphic *Sftpc*<sup>C121Gneo/C121Gneo</sup> founder line does not produce mutant proSP-C protein due to a retained intronic PGK-neo cassette and lacks a spontaneous lung phenotype.**

(A) Schematic diagram of the knocked-in *Sftpc*<sup>C121Gneo</sup> allele showing cysteine-to-glycine substitution at codon 121 (C121G) at the 3' end of exon 3c and the PGK-Neomycin cassette in Intron 4 flanked by locus of X-over P1 (lox-P) sites (blue arrows). (B) qRT-PCR analysis for *Sftpc* expression in the purified AT2 cells from homozygous *Sftpc*<sup>C121Gneo/C121Gneo</sup> and *Sftpc*<sup>WT</sup> mice. Data normalized to 18S RNA are expressed as fold change in *Sftpc* mRNA from control mice. (C) Western blot analysis of the AT2 cell lysate from *Sftpc*<sup>WT</sup> and *Sftpc*<sup>C121Gneo/C121Gneo</sup> mice showing an absence of proSP-C in the founder line. (D) *Sftpc*<sup>C121Gneo/C121Gneo</sup> and *Sftpc*<sup>WT</sup> mice were subjected to pulmonary function testing at 52 weeks with calculated static compliance demonstrating no difference between genotypes by students t-test. (E) Dot-plot of BAL cell counts in *Sftpc*<sup>C121Gneo/C121Gneo</sup> and *Sftpc*<sup>WT</sup> mice at combined time points of 16, 32, and 52 weeks show no difference in total cell counts between genotypes by students t-test. (F) Representative 10x magnification photomicrograph of H&E stained section from a 52 week *Sftpc*<sup>C121Gneo/C121Gneo</sup> mouse. Bar = 500  $\mu$ M.

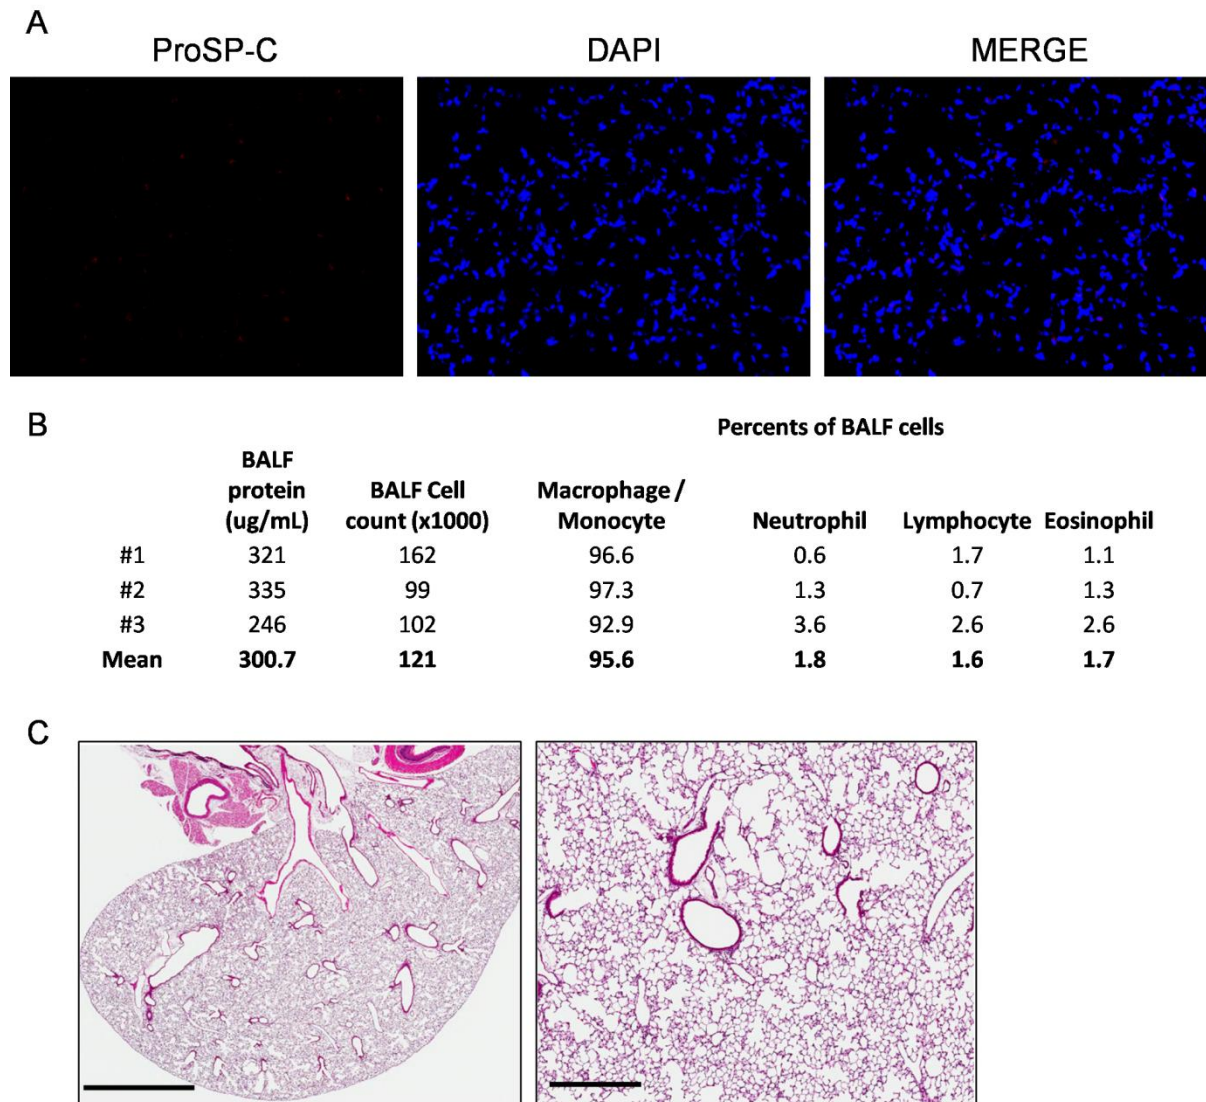

**Supplemental Figure 2. *Sftpc*<sup>C121G/C121G</sup> / *R26*<sup>Cre</sup> mice have no spontaneous phenotype.**

(A) 20x immunofluorescent microscopy of vehicle (oil) intraperitoneal (IP) injected *Sftpc*<sup>C121G/C121G</sup> / *R26*<sup>Cre</sup> for proSP-C and Dapi showing absence of proSP-C protein in AT2 cells. Representative of 5 x 20x fields per mouse in 3 individual mice. (B) Cell counts and differentials from 3 *Sftpc*<sup>C121G/C121G</sup> / *R26*<sup>Cre</sup> mice following IP vehicle showing normal BALF cell numbers and differentials. (C) Representative low powered (left) and high powered (right) photomicrograph of H&E stained section from *Sftpc*<sup>C121G/C121G</sup> / *R26*<sup>Cre</sup> showing normal alveolar architecture following IP vehicle (Left 5x magnification bar= 2 mM; right 10x magnification bar= 500 μM).

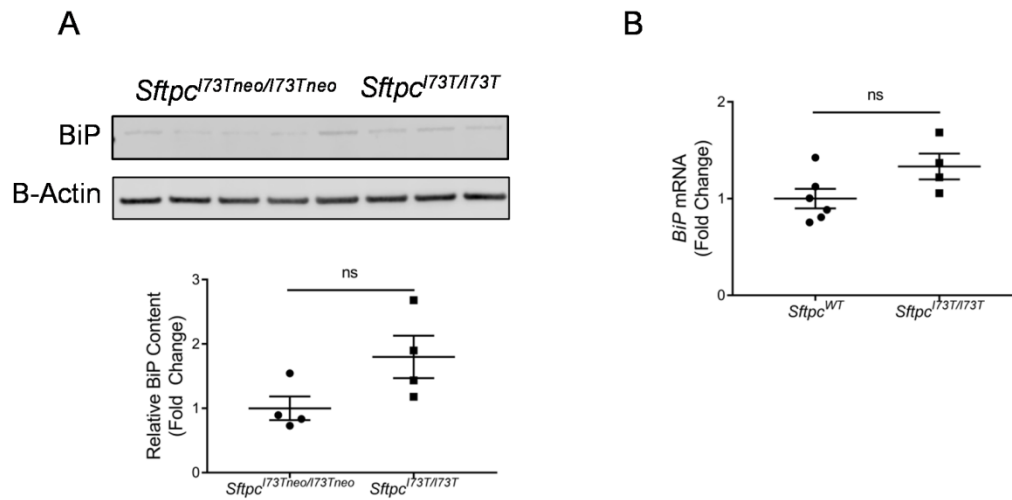

**Supplemental Figure 3. Expression of the *Sftpc*<sup>I73T</sup> mutation *in vivo* does not generate substantial ER stress**

**(A)** Western blot analysis (upper) of AT2 cell lysate isolated 2 weeks post-tamoxifen from *Sftpc*<sup>I73Tneo/I73Tneo</sup> control mice and homozygous *Sftpc*<sup>I73T</sup> expressing mice demonstrate no significant difference in relative BiP content (lower) by densitometry. Non-significant vs control using unpaired two tailed t-test. **(B)** Dot-plots with mean and SEM of *BiP* mRNA expression measured by qRT-PCR in AT2 cells from *Sftpc*<sup>I73T</sup> expressing *Sftpc*<sup>I73T/I73T</sup> / *R26*<sup>Flpo</sup> mice and *Sftpc*<sup>WT</sup> / *R26*<sup>Flpo</sup> controls 14 days following tamoxifen. Non-significant vs control using unpaired two tailed t-test.

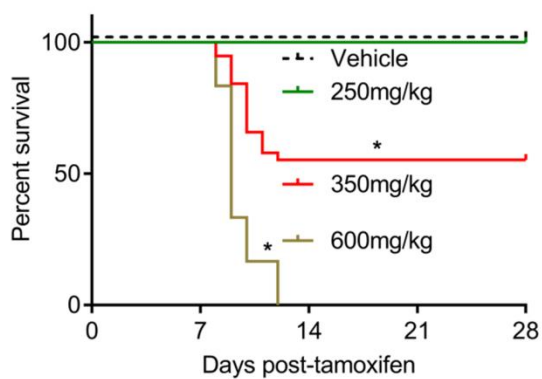

**Supplemental Figure 4. Survival of *Sftpc*<sup>C121G/C121G</sup> / *R26*<sup>Cre</sup> mice as a function of tamoxifen dose.**

Kaplan–Meier analysis for survival of *Sftpc*<sup>C121G/C121G</sup> / *R26*<sup>Cre</sup> mice treated with vehicle (oil) or tamoxifen at the indicated doses. Endpoints were defined as death or body weight < 75% on 2 consecutive days.  $p < 0.001$  vs vehicle control by Log-rank (Mantel-Cox) test.

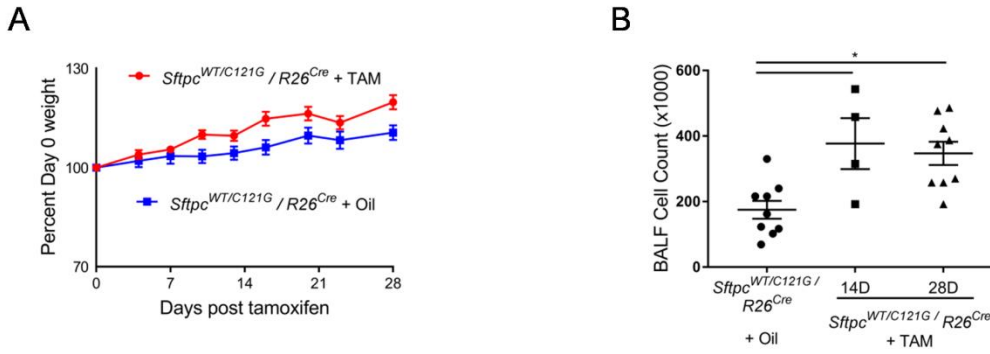

**Supplemental Figure 5. Tamoxifen treatment of heterozygous *Sftpc*<sup>WT/C121G</sup> / *R26*<sup>Cre</sup> induced an inflammatory phenotype.**

(A) Body weight measured in *Sftpc*<sup>WT/C121G</sup> / *R26*<sup>Cre</sup> animals treated with tamoxifen (600mg/kg) or Oil (control). (B) BALF cell count determined in *Sftpc*<sup>WT/C121G</sup> / *R26*<sup>Cre</sup> mice at 14 and 28 days after treatment with tamoxifen (600mg/kg) or Oil (controls). \* p < 0.05 versus controls by One Way ANOVA followed by post-hoc Tukey test.

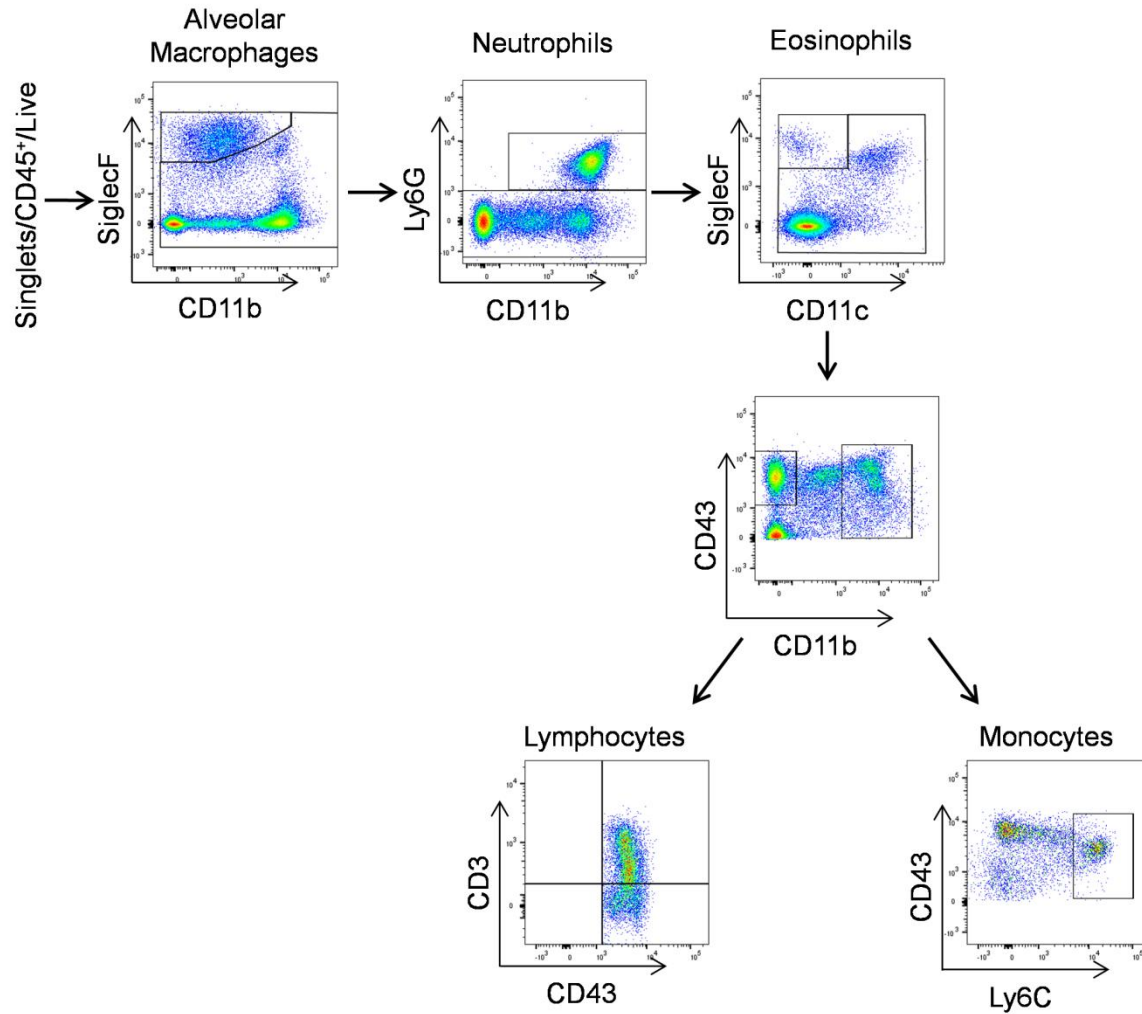

**Supplemental Figure 6. Flow cytometric gating strategy for analysis of whole lung digest.**

Representative flow cytometric analysis for identification of immune cell populations in whole lung digest at 3 days post-tamoxifen. Immune cells were identified by singlet identification of CD45<sup>+</sup> viable cells followed by gating strategy as above with antibodies listed in **Supplemental Table 6**.

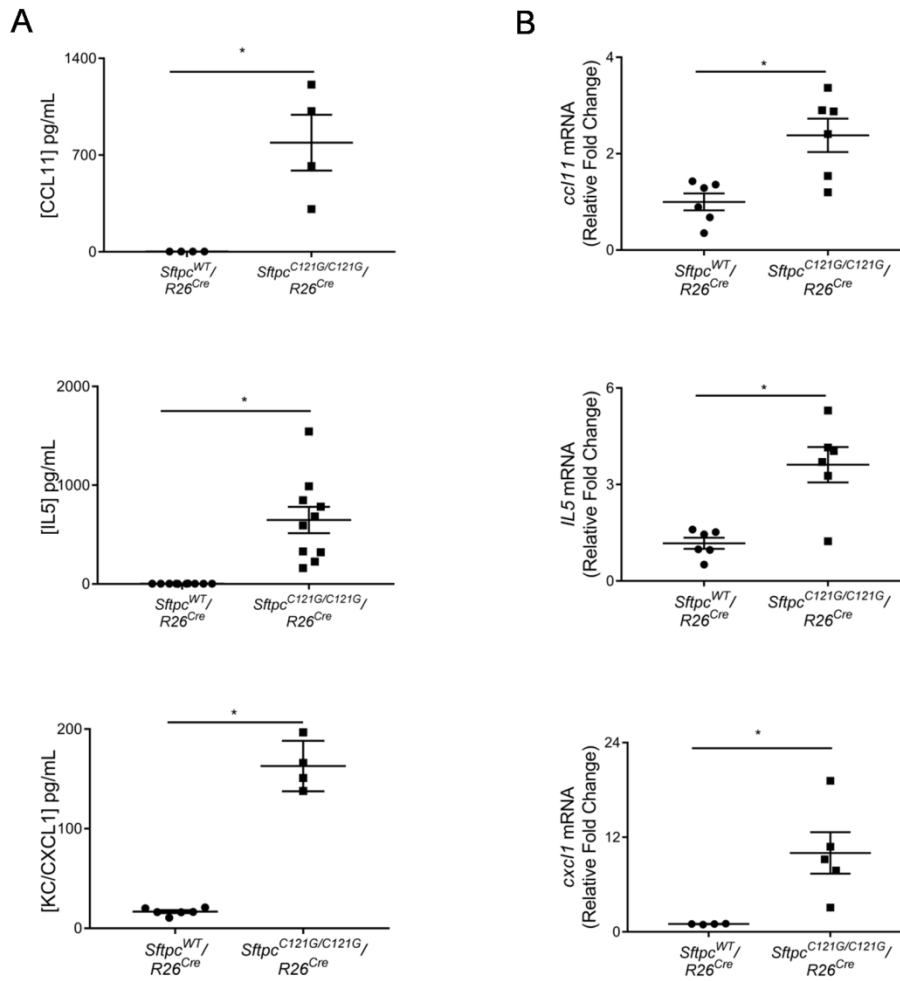

**Supplemental Figure 7. *Sftpc*<sup>C121G</sup> AT2 cells are the source of multiple granulocyte recruitment cytokines.**

**(A)** Dot-plots with mean and SEM of BALF content of CCL11 (upper), IL5 (middle), and CXCL1 (KC/IL8) (lower) protein in *Sftpc*<sup>C121G/C121G</sup> / *R26*<sup>Cre</sup> mice and *Sftpc*<sup>WT</sup> / *R26*<sup>Cre</sup> controls 7 days following tamoxifen determined by Luminex assay. \*  $p < 0.05$  versus controls by One Way ANOVA followed by post-hoc Tukey test (see **Supplemental Table 2** for complete time course). **(B)** Dot-plots with mean and SEM of *Ccl11* (upper), *Il5* (middle), and *Cxcl1* (lower) mRNA expression measured by qRT-PCR in samples of AT2 cells from *Sftpc*<sup>C121G/C121G</sup> / *R26*<sup>Cre</sup> mice and controls 7 days following tamoxifen. \* $p < 0.05$  vs control using unpaired two tailed t-test.

Supplemental Figure 8

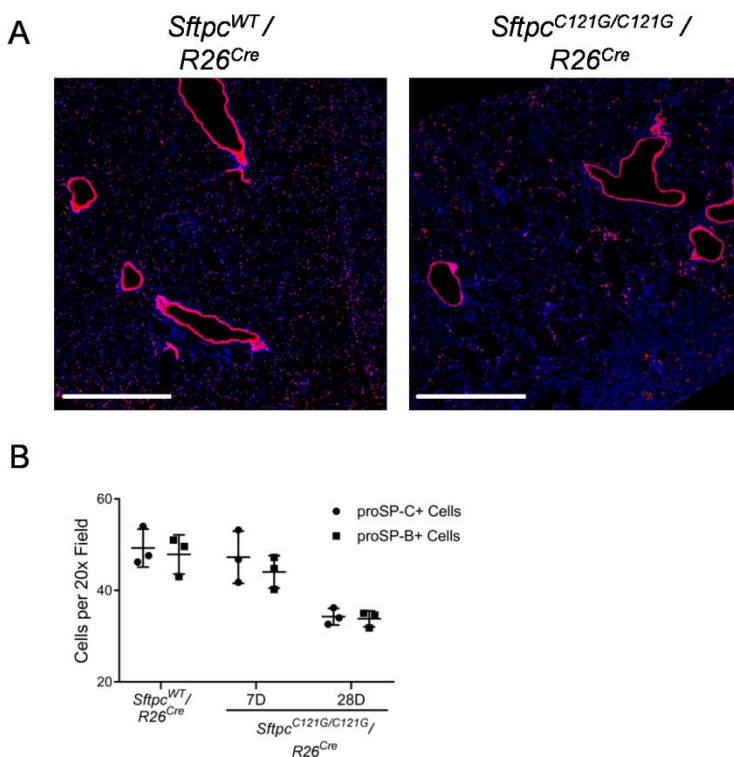

**Supplemental Figure 8. For weeks post-tamoxifen *Sftpc*<sup>C121G</sup> expressing mice have decreased AT2 cell density with heterogenous distrubution.**

(A) Representative 2X immunoflorescent microscopy stained for proSP-C (red) and Dapi (blue) showing decreased AT2 cell density in the *Sftpc*<sup>C121G/C121G</sup> / *R26*<sup>Cre</sup> lung section compared to control. (B) ProSP-B and proSP-C positive cells were quantified in *Sftpc*<sup>WT</sup> / *R26*<sup>Cre</sup> and *Sftpc*<sup>C121G/C121G</sup> / *R26*<sup>Cre</sup> mice at 7 and 28 days after tamoxifen by manually counting 20X immunoflorescent stained micrograph. Data is shown as individual dot-plots of mean and SD.

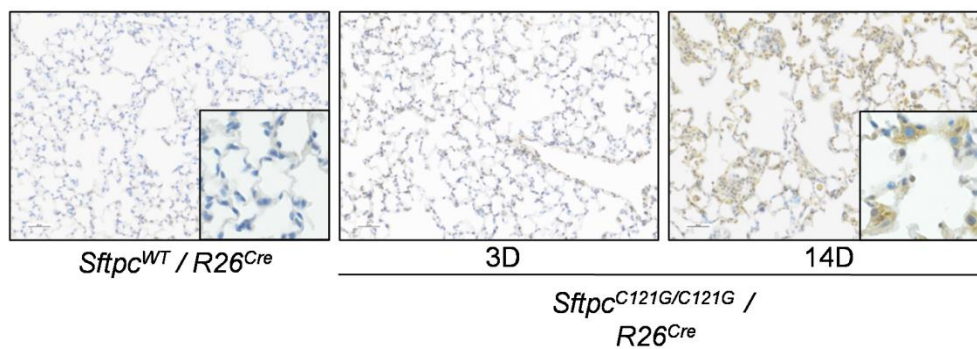

**Supplemental Figure 9. The *Sftpc*<sup>C121G</sup> AT2 cell is a source of TGF-  $\beta$ 1.**

Representative immunohistochemistry for TGF- $\beta$ 1 protein in paraffin imbedded lung sections from *Sftpc*<sup>WT</sup> / *R26*<sup>Cre</sup> and *Sftpc*<sup>C121G/C121G</sup> / *R26*<sup>Cre</sup> at 3 and 14 days after tamoxifen shows increased TGF- $\beta$ 1 staining in (insert) *Sftpc*<sup>C121G/C121G</sup> / *R26*<sup>Cre</sup> AT2 cells at 14 days.

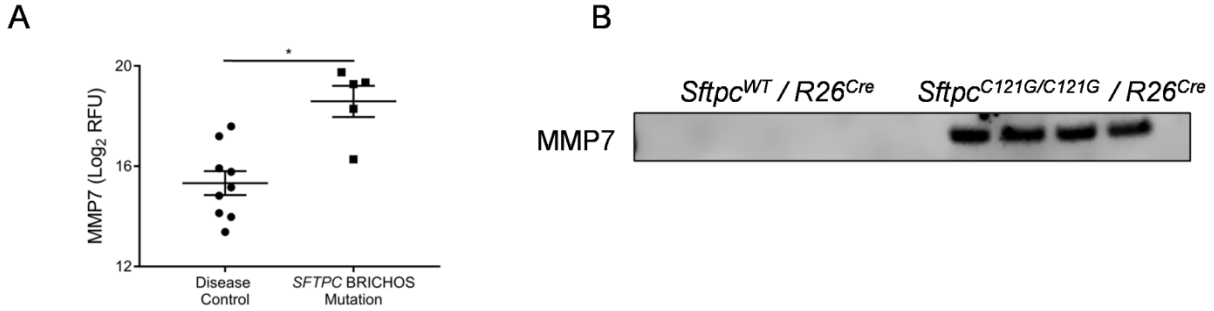

**Supplemental Figure 10. MMP7 is elevated in the BALF of *SFTPC* BRICHOS pediatric cohort and *Sftpc*<sup>C121G</sup> mice during transition to fibrotic remodeling.**

**(A)** Individual Dot-plots of mean and SEM log<sub>2</sub> RFUs for MMP7 from disease control (n=9) and *SFTPC* BRICHOS mutation patients (n=5). \* p < 0.05 *SFTPC* BRICHOS mutations cases and disease control by unpaired two tailed t-test. **(B)** Western blotting of BALF (15μl/lane) for MMP-7 protein in *Sftpc*<sup>WT</sup>/*R26*<sup>Cre</sup> controls and *Sftpc*<sup>C121G/C121G</sup>/*R26*<sup>Cre</sup> mice 14 days after tamoxifen.

**Supplemental Table 1. Ontonagy of BALF effector cell populations following *Sftpc*<sup>C121G</sup> expression.**

| Effector Cell<br>(Total Recovered) | <i>Sftpc</i> <sup>WT</sup> / <i>R26</i> <sup>Cre</sup><br>(n=15) | <i>Sftpc</i> <sup>C121G/C121G</sup> / <i>R26</i> <sup>Cre</sup> |                  |                  |                  |
|------------------------------------|------------------------------------------------------------------|-----------------------------------------------------------------|------------------|------------------|------------------|
|                                    |                                                                  | 3 Days<br>(n=5)                                                 | 7 Days<br>(n=13) | 14 Days<br>(n=9) | 28 Days<br>(n=5) |
| <b>Macrophage/ Monocytes</b>       | 120.8 ± 11.8                                                     | 281.0 ± 31.7                                                    | 300.9 ± 23.3*    | 522.5 ± 60.7*    | 480.0 ± 115.1*   |
| <b>Neutrophils</b>                 | 2.6 ± 0.7                                                        | 12.5 ± 6.1                                                      | 137.4 ± 25.1*    | 368.3 ± 83.2*    | 38.1 ± 16.2      |
| <b>Eosinophils</b>                 | 0.7 ± 0.2                                                        | 0.8 ± 0.8                                                       | 90.9 ± 10.4      | 366.5 ± 81.6*    | 45.4 ± 9.0       |
| <b>Lymphocytes</b>                 | 2.0 ± 0.2                                                        | 5.7 ± 1.4                                                       | 11.6 ± 1.3       | 44.0 ± 11.1*     | 52.5 ± 7.3*      |

BALF isolated from control (*Sftpc*<sup>WT</sup>/ *R26*<sup>Cre</sup>) and *Sftpc*<sup>C121G/C121G</sup>/ *R26*<sup>Cre</sup> mice 3, 7, 14, and 28 days tamoxifen treatment were analyzed for total cell numbers by Z1 Coulter Counter. Individual cell populations were determined by manual differential counts of Giemsa stained cytopins (>200 cells/slide). Data are expressed as cell number for each population (mean ± SEM) \*p< 0.05 versus controls by One Way ANOVA followed by post-hoc Tukey test.

**Supplemental Table 2. Time course for BALF cytokines induced by *Sftpc*<sup>C121G</sup> expression.**

|                                                                 | CCL2               | CCL7               | CCL17               | GM-CSF            | IL-1 $\beta$  | IL-4           | IL-5                | IL-6              | IL-13         | KC/<br>CXCL1       |
|-----------------------------------------------------------------|--------------------|--------------------|---------------------|-------------------|---------------|----------------|---------------------|-------------------|---------------|--------------------|
| <i>Sftpc</i> <sup>WT</sup> / <i>R26</i> <sup>Cre</sup>          | 2.8 $\pm$ .4       | 24.6 $\pm$ 8.9     | 34.1 $\pm$ 11.5     | 3.2 $\pm$ 0       | 6.1 $\pm$ 0.4 | 0.9 $\pm$ 0.2  | 2.7 $\pm$ 0.4       | 3.4 $\pm$ 0.4     | 9.5 $\pm$ 3.1 | 16.7 $\pm$ 1.5     |
| <i>Sftpc</i> <sup>C121G/C121G</sup> / <i>R26</i> <sup>Cre</sup> |                    |                    |                     |                   |               |                |                     |                   |               |                    |
| <b>3 Days</b>                                                   | 4.0 $\pm$ 1.0      | 40.9 $\pm$ 10.8    | 211.8 $\pm$ 43.1    | 5.9 $\pm$ 1.3     | 5.3 $\pm$ 0.3 | 1.1 $\pm$ 0.2  | 14.5 $\pm$ 4.8      | 171 $\pm$ 22.11   | 9.6 $\pm$ 3.0 | 51.1 $\pm$ 9.9     |
| <b>7 Days</b>                                                   | 315.4 $\pm$ 98.3 * | 133.8 $\pm$ 18.1 * | 390.3 $\pm$ 103.6 * | 13.14 $\pm$ 2.7 * | 6.8 $\pm$ 0.4 | 2.3 $\pm$ 0.3  | 828.6 $\pm$ 165.2 * | 5824 $\pm$ 1349 * | 8.2 $\pm$ 1.6 | 162.9 $\pm$ 12.6 * |
| <b>14 Days</b>                                                  | 182.6 $\pm$ 77.3 * | ---                | 518 $\pm$ 109.9 *   | 14.7 $\pm$ 3.8 *  | 6.2 $\pm$ 0.7 | 5.0 $\pm$ 2.28 | 508.4 $\pm$ 156.4   | 3421 $\pm$ 1170   | 7.3 $\pm$ 1.4 | 204.7 $\pm$ 61.9 * |
| <b>28 Days</b>                                                  | 3.97 $\pm$ 0.8     | ---                | 214.2 $\pm$ 114.3   | 3.2 $\pm$ 0       | 4.5 $\pm$ 0.5 | 0.9 $\pm$ 0.3  | 6.8 $\pm$ 1.3       | 22.24 $\pm$ 13.7  | 6.5 $\pm$ 0.9 | 34.1 $\pm$ 6.8     |

BALF isolated from control (*Sftpc*<sup>WT</sup>/ *R26*<sup>Cre</sup>) and *Sftpc*<sup>C121G/C121G</sup> / *R26*<sup>Cre</sup> mice 3, 7, 14, and 28 days tamoxifen treatment were analyzed by multiplex assay (ELISA for CCL7 performed at 3 and 7 days only) for expression of cytokines shown above as described in Method. Mean  $\pm$  SEM, n = 4-12 samples per group in pg/mL. \* p< 0.05 versus controls by One Way ANOVA followed by post-hoc Tukey test.

**Supplemental Table 3. Demographics and BALF cell counts in pediatric *SFTPC* BRICHOS cohort and disease controls.**

|                                       | <b>Disease<br/>Controls<br/>(n = 9)</b> | <b><i>SFTPC</i><br/>BRICHOS<br/>Mutation<br/>(n = 5)</b> | <b>p-value</b> |
|---------------------------------------|-----------------------------------------|----------------------------------------------------------|----------------|
| <b>Age at Diagnosis (years)</b>       | 1.8 (0.5, 6.8)                          | 2.0 (0.2, 10.8)                                          | 0.79           |
| <b>WBC, cells/ml x 10<sup>3</sup></b> | 178 (59, 358)                           | 389 (141, 950)                                           | 0.05           |
| <b>% Neutrophils</b>                  | 2 (0, 18)                               | 10 (7, 13)                                               | 0.25           |
| <b>% Lymphocytes</b>                  | 9 (0, 35)                               | 3 (0, 20)                                                | 0.50           |
| <b>% Macrophage/Monocyte</b>          | 82 (58, 97)                             | 87 (53, 89)                                              | 0.99           |
| <b>% Eosinophils</b>                  | 0 (0, 0)                                | 1 (0, 15)                                                | 0.02           |
| <b>% Epithelium</b>                   | 4 (1, 11)                               | 0 (0, 7)                                                 | 0.06           |

Median (and range) for age at ChILD diagnosis, BALF cell count per mL, and percent of total WBCs by effector cell type for disease controls and *SFTPC* BRICHOS mutation patients. P-value reflects two-sample t-test assuming unequal variances between groups.

**Supplemental Table 4. Antibodies.**

| <b>Western Blot</b>                      |                  |                 |                       |                         |
|------------------------------------------|------------------|-----------------|-----------------------|-------------------------|
| <b>Antibody</b>                          | <b>Clonality</b> | <b>Dilution</b> | <b>Catalog Number</b> | <b>Manufacturer</b>     |
| EGFP                                     | Monoclonal       | 1:2000          | 632381                | Living Color            |
| ProSP-C                                  | Polyclonal       | 1:3000          | 22871                 | In house                |
| β-Actin                                  | Monoclonal       | 1:10000         | A1978                 | Sigma Aldrich           |
| BiP                                      | Monoclonal       | 1:1000          | 3177                  | Cell Signaling          |
| Mature SP-C                              | Polyclonal       | 1:2500          | WRAB-76694            | Seven Hills Bioreagents |
| SP-B                                     | Polyclonal       | 1:500           | PT3                   | In house                |
| Phos-JNK                                 | Monoclonal       | 1:1000          | 9255                  | Cell Signaling          |
| Total-JNK                                | Monoclonal       | 1:1000          | 9258                  | Cell Signaling          |
| ATF4                                     | Monoclonal       | 1:1000          | 11815                 | Cell Signaling          |
| CHOP                                     | Monoclonal       | 1:500           | 5554                  | Cell Signaling          |
| ATF6                                     | Monoclonal       | 1:500           | 70B1413.1             | Novus                   |
| MMP-7                                    | Monoclonal       | 1:1000          | 3801                  | Cell Signaling          |
| <b>Histochemistry/Immunofluorescence</b> |                  |                 |                       |                         |
| ProSP-C                                  | Polyclonal       | 1:200           | 22871                 | In house                |
| ProSP-C                                  | Polyclonal       | 1:50            | SC-7750               | Santa Cruz              |
| ProSP-B                                  | Polyclonal       | 1:200           | PT-3                  | In house                |
| K-del                                    | Monoclonal       | 1:200           | ADI-SPA-827           | Enzo                    |
| Cleaved Caspase 3                        | Polyclonal       | 1:10            | CP-229A               | Biocare Medical         |
| TGF-β1                                   | Polyclonal       | 1:250           | BS-0086R              | Bioss Antibodies        |
| Smooth Muscle Actin                      | Monoclonal       | 1:500           | A2547                 | Sigma                   |

**Supplemental Table 5. qPCR Primers.**

| Taqman Primers                |               |
|-------------------------------|---------------|
| 18S                           | Mm03928990_g1 |
| <i>BiP</i>                    | Mm00517691_m1 |
| <i>Ccl2</i> (MCP-1)           | Mm00441242_m1 |
| <i>Ccl7</i> (MCP-3)           | Mm00443113_m1 |
| <i>Ccl17</i> (TARC)           | Mm01244826_g1 |
| <i>Cxcl1</i> (GroA/KC)        | Mm04207460_m1 |
| <i>Cxcl11</i> (eotaxin)       | Mm0041238_m1  |
| <i>Col1a1</i>                 | Mm00801666_g1 |
| <i>Col3a1</i>                 | Mm01254476_m1 |
| <i>Il5</i>                    | Mm00439646_m1 |
| <i>Il6</i>                    | Mm00446190_m1 |
| <i>Sftpc</i>                  | Mm00488144_m1 |
| <i>tgfb1</i> (TGF- $\beta$ 1) | Mm01178820_m1 |
| XBP1 Spliced                  | Mm03464496_m1 |
| XBP1 Unspliced                | Mm03464497_s1 |

**Supplemental Table 6. Flow Cytometric Analysis Antibodies.**

| <b>Antibody</b> | <b>Fluorochrome</b> | <b>Clone</b> | <b>Catalog Number</b> | <b>Manufacturer</b> |
|-----------------|---------------------|--------------|-----------------------|---------------------|
| CD16/32         | -                   | 93           | 14-0161-85            | eBioscience         |
| CD45            | PerCP               | 30-F11       | 103130                | Biolegend           |
| SiglecF         | PE-CF594            | E50-2440     | 562757                | BD Biosciences      |
| CD11b           | BV421               | M1/70        | 101235                | Biolegend           |
| Ly6G            | AF700               | 1A8          | 127622                | Biolegend           |
| CD11c           | B711                | HL3          | 563048                | BD Biosciences      |
| CD43            | PE                  | S11          | 143205                | Biolegend           |
| CD3             | BUV395              | 17A2         | 740268                | Biolegend           |
| Ly6C            | BV510               | HK1.4        | 128033                | Biolegend           |
| Viability Dye   | eFluo780            | NA           | 65-0865-14            | eBioscience         |
